# Supplementary material
Source: PubMed Central journal article supplement (PMC4356216)
Supplement: Supp_Fig1.pdf [file Supp_Fig1.pdf]

## Supplementary Data

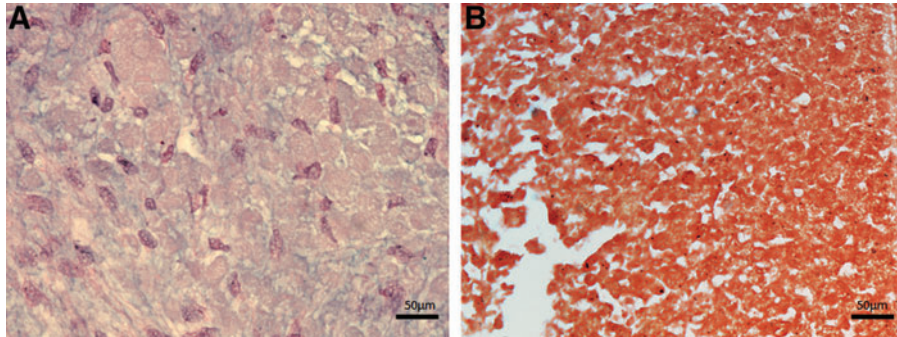

**SUPPLEMENTARY FIG. S1.** Demonstration of the multipotent capacity of expanded murine mesenchymal stem cells (mMSCs). Staining with Alcian blue (**A**) and Alizarin Red (**B**), were used to show the potential of mMSCs to differentiate toward a chondrogenic and osteogenic lineage when cultured for 21 days in osteogenic medium or chondrogenic medium, respectively. For details see Materials and Methods section.
