# Supplementary material
Source: PubMed Central journal article supplement (PMC4356216)
Supplement: Supp_Fig2.pdf [file Supp_Fig2.pdf]

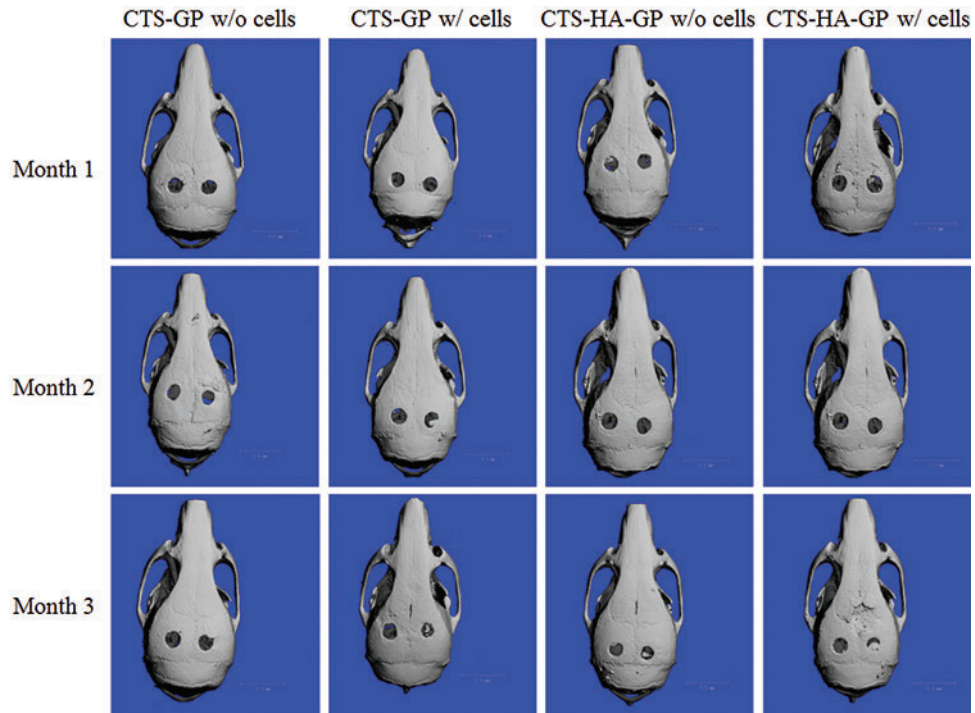

**SUPPLEMENTARY FIG. S2.** Representative microCT images of the entire time course of the study. Micrographs indicate that the most significant healing processes occurred between 2 and 3 months of treatment. After 1 month, little difference was observed in any of the samples. Scale bar= 5 mm.
